# Supplementary material
Source: PubMed Central journal article supplement (PMC4455815)

**Figure S1**

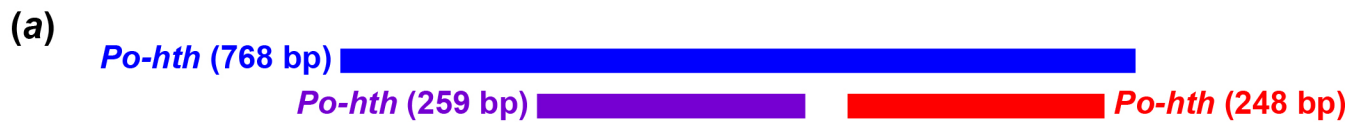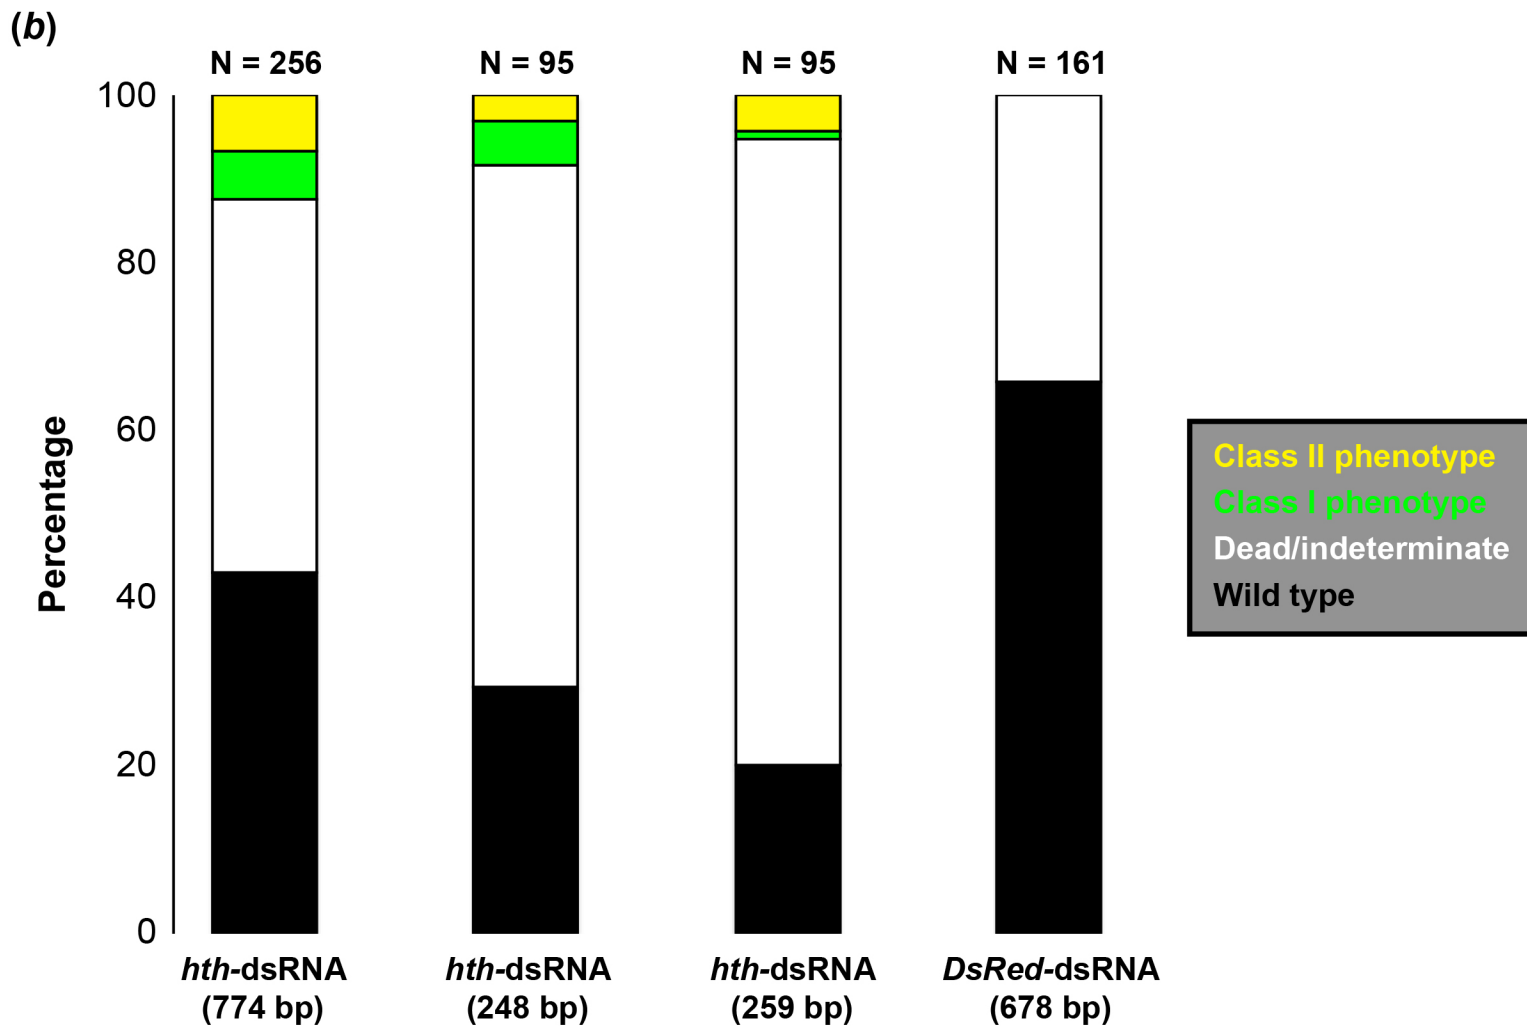

**Figure S2**

*DsRed-dsRNA* (Control)

*hth-dsRNA*

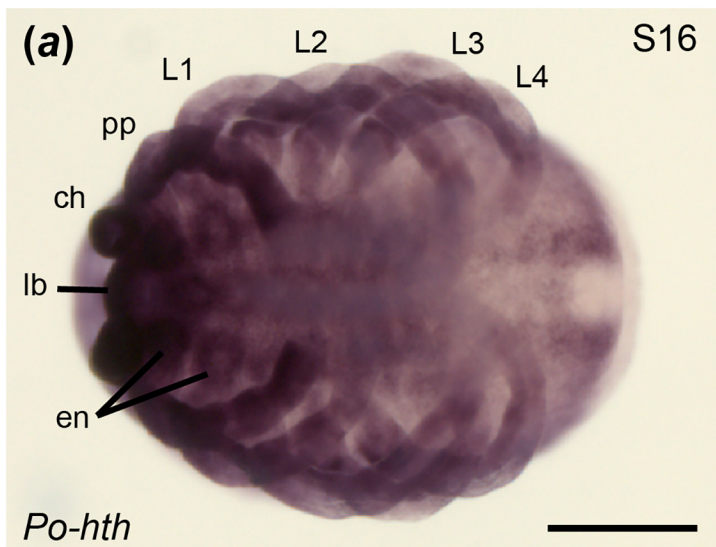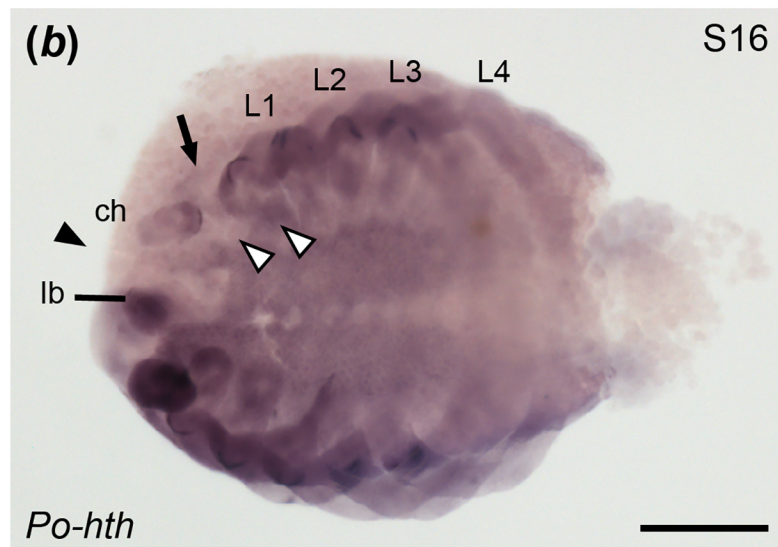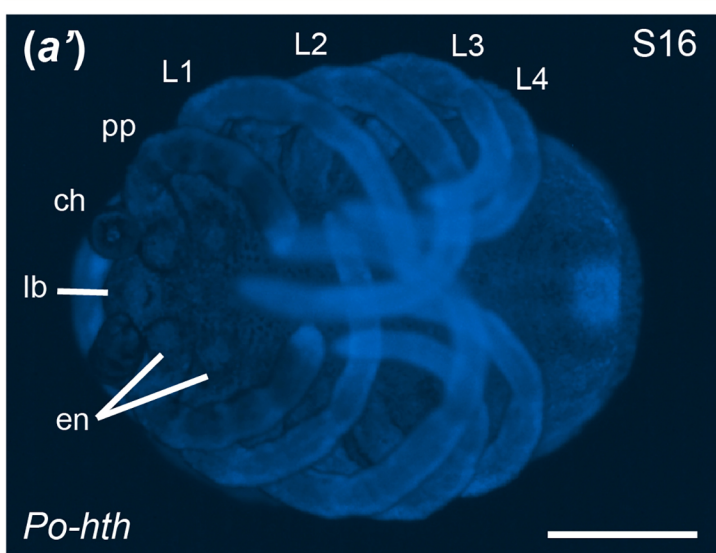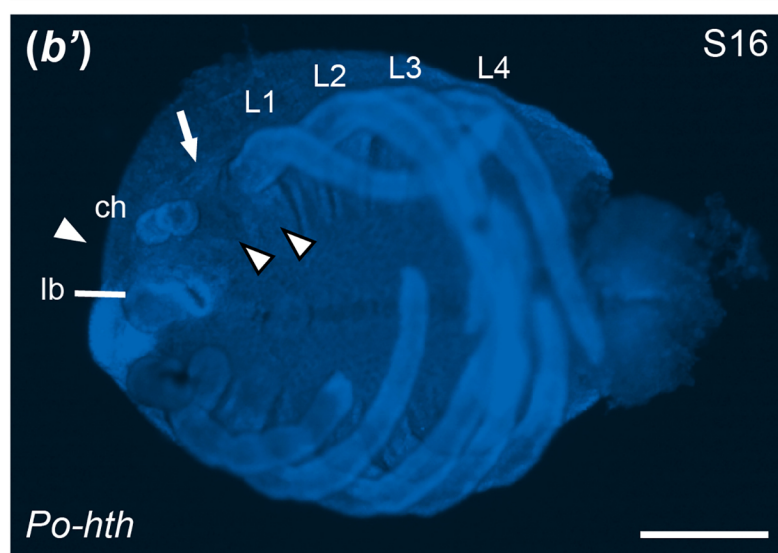

*DsRed-dsRNA* (Control)

*hth-dsRNA*

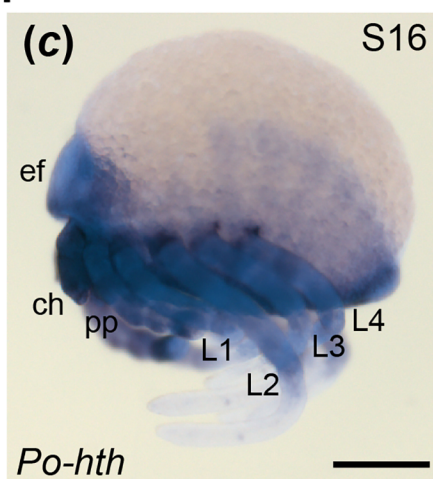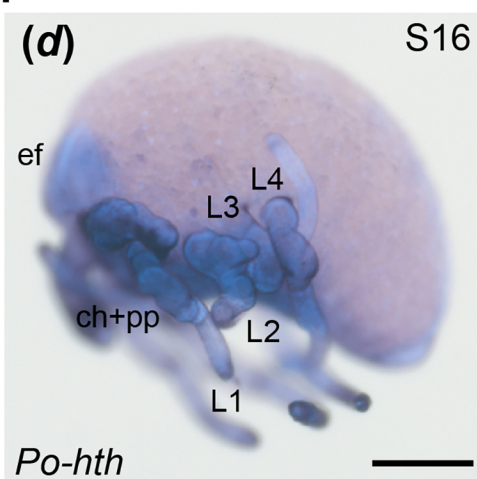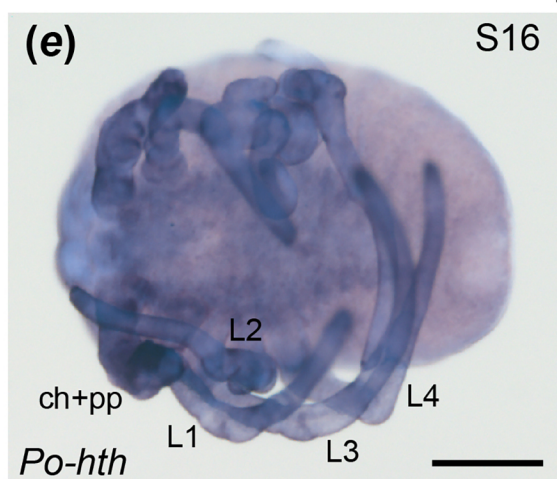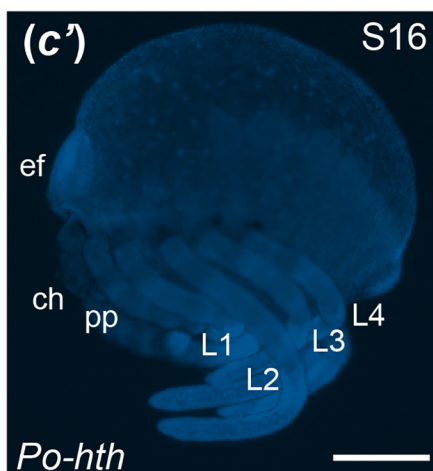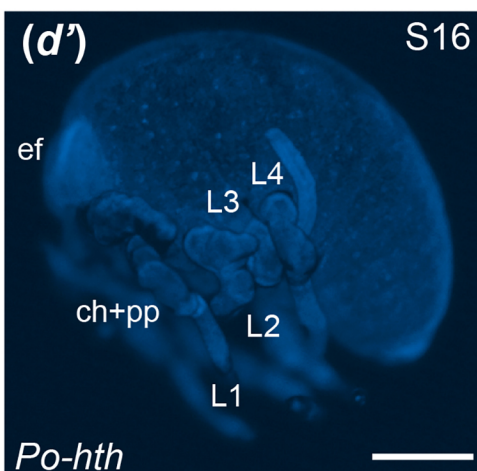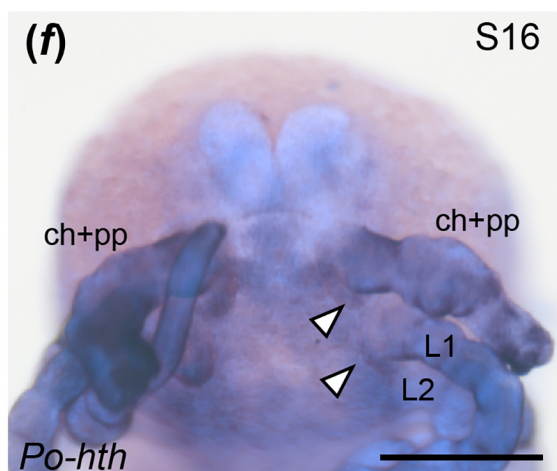

**Figure S3**

**DsRed-dsRNA (Control)**

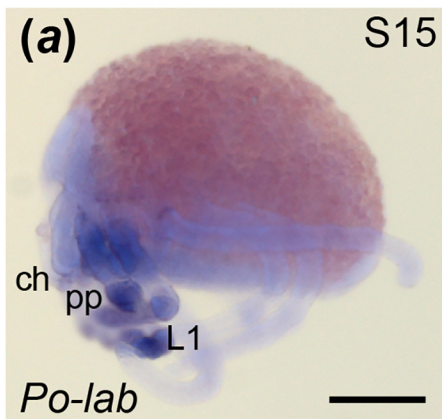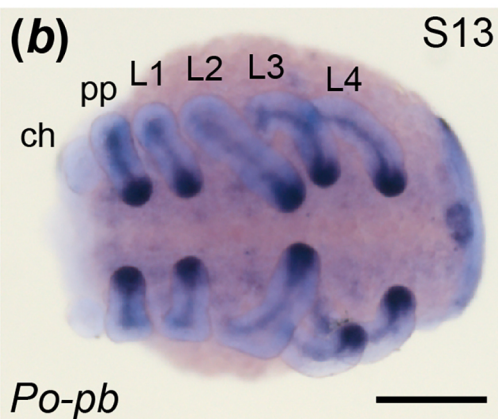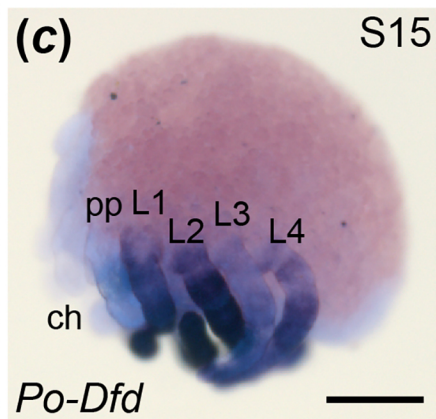

**hth-dsRNA**

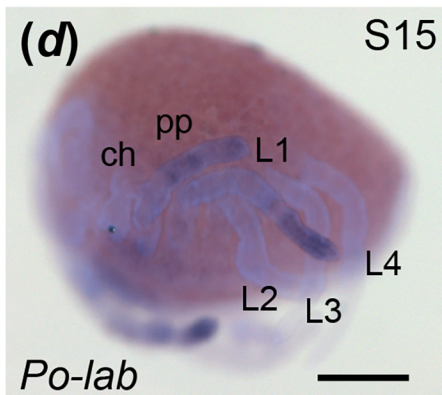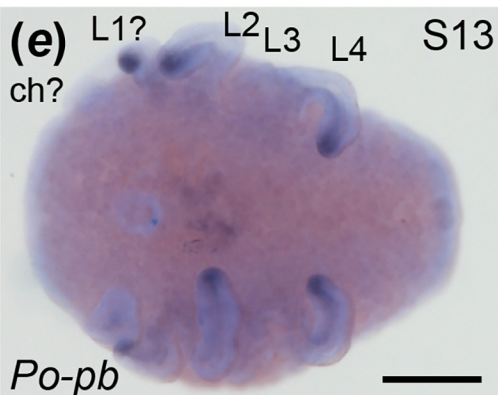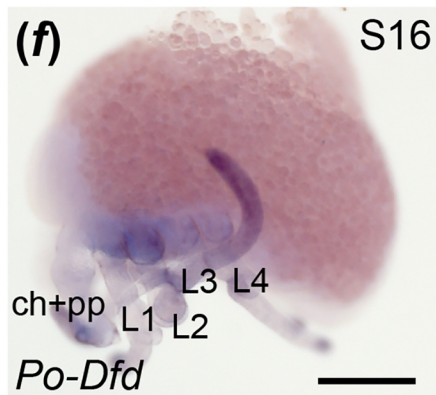

# Figure S4

(a)

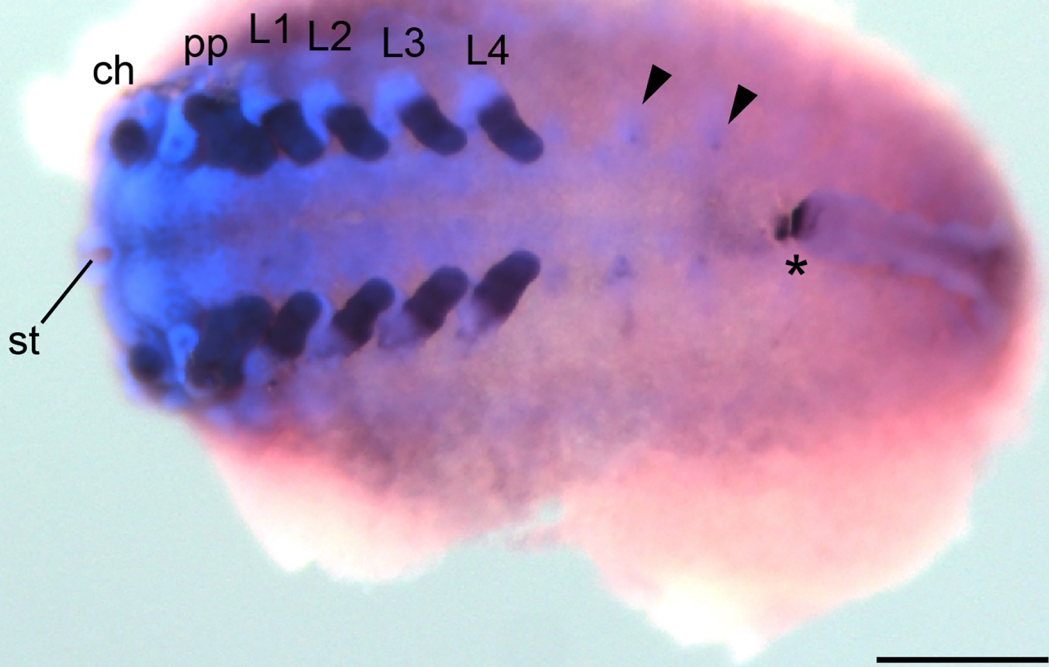

(a')

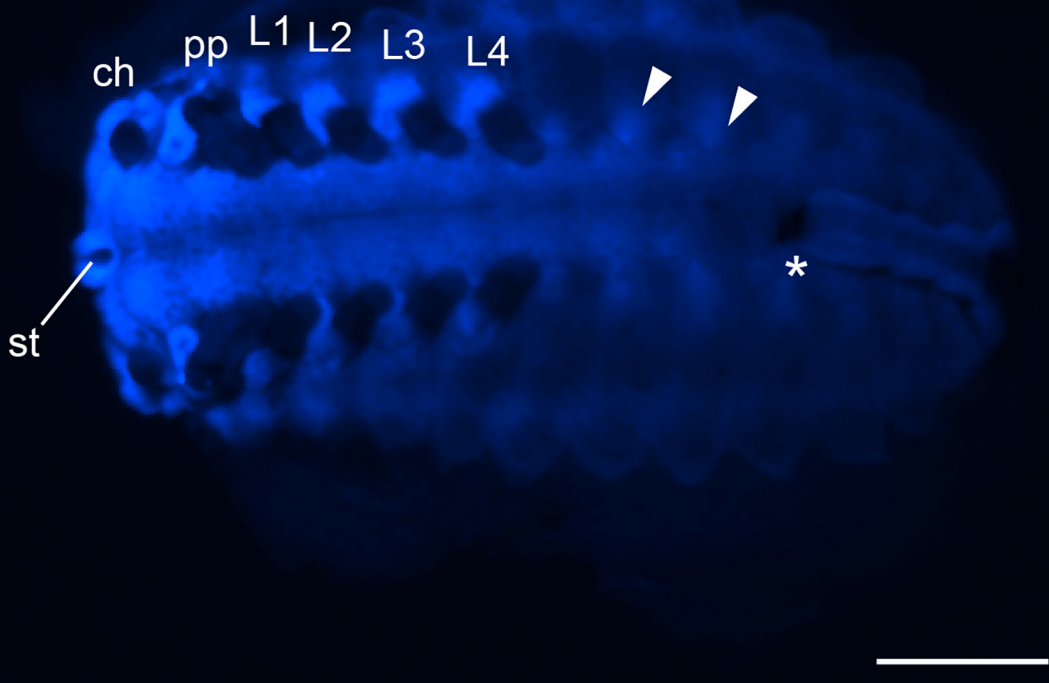

Supplement: rspb20150698supp1.pdf [file rspb20150698supp1.pdf]
